# Supplementary material for: The effects of charring on morphology and stable carbon and nitrogen isotope values of common and foxtail millet grains
Source: Frontiers journal article supplement (doi:10.3389/fearc.2024.1473593), 2024-11-29
Supplement: Table_2.xlsx [file Table_2.xlsx]

## Sheet: Panicum_Carbon runset
Ps	ID	Wt	NugR	d15NR	CugR	d13CR	d18OR	Nugdc	d15Ndc	Cugdc	d13Cdc	d18Odc	Runfile	pcC	pcN	CN	normd13C	normd15N
2	ALANINE	1.03	15.7	-1.56	40.4	-27.11	-18	161.71	-1.56002	416.12	-27.1102	-47.4064	221212	40.4	15.7	3.00212	-27.0519	-1.35909
3	ALANINE	1.1	173.359	-1.53496	449.257	-26.9798	-50.3264	172.64	-1.58104	446.136	-27.0393	-49.4276	221212	40.5578	15.6946	3.0149	-26.9809	-1.37947
4	ALANINE	1.11	174.081	-1.40393	452.758	-26.925	-52.0115	172.643	-1.4961	446.511	-27.044	-50.2154	221212	40.2262	15.5534	3.01739	-26.9855	-1.29716
5	ALANINE	1.14	178.962	-1.36498	465.279	-26.8888	-51.882	176.753	-1.50324	455.715	-27.0674	-49.1849	221212	39.975	15.5046	3.00798	-27.009	-1.30408
6	ALANINE	1.1	172.219	-1.28754	449.358	-26.8779	-51.8245	169.396	-1.47188	437.127	-27.1162	-48.2247	221212	39.7388	15.3997	3.01058	-27.0579	-1.27369
7	ALANINE	1.04	15.7	-1.56	40.4	-27.11	-18	163.28	-1.56002	420.16	-27.1102	-47.4064	221212	40.4	15.7	3.00212	-27.0519	-1.35909
8	ALANINE	1.14	173.98	-1.50583	449.09	-27.2006	-47.599	174.27	-1.50699	449.94	-27.2018	-47.555	221212	39.4684	15.2869	3.01216	-27.1436	-1.30772
9	Glutamic A	1.18	96.9532	-1.92628	425.363	-10.7708	-47.7273	97.2768	-1.92861	426.975	-10.7732	-47.6394	221212	36.1843	8.2438	5.12082	-10.6983	-1.71623
10	PAND01	1.06	15.3691	8.03099	427.905	-12.4923	-47.9488	15.4462	8.02746	430.342	-12.4959	-47.817	221212	40.5983	1.45719	32.5041	-12.4228	7.93057
11	PAND02	1.04	14.817	7.28947	423.731	-12.5263	-47.7291	14.9163	7.28477	426.955	-12.5312	-47.5532	221212	41.0533	1.43426	33.3939	-12.4581	7.21095
12	PAND03	1.06	15.7732	8.17916	436.423	-12.5797	-47.8408	15.9054	8.17328	440.581	-12.5858	-47.621	221212	41.5642	1.50051	32.3167	-12.5127	8.07186
13	Leucine	0.76	77.0824	6.38418	403.23	-28.2961	-47.3255	77.8595	6.37713	407.849	-28.3035	-47.0616	221212	53.6644	10.2447	6.11132	-28.2463	6.33151
14	SEAL	1.04	148.682	15.6271	427.118	-12.8309	-48.0069	150.434	15.6188	432.836	-12.8394	-47.6992	221212	41.6189	14.4648	3.3568	-12.7666	15.2861
15	SALANINE	1.05	159.878	-1.59497	411.429	-27.2533	-47.8259	162.034	-1.60429	417.736	-27.2631	-47.4741	221212	39.7844	15.4318	3.00776	-27.2048	-1.40199
16	ALANINE	1.09	15.7	-1.56	40.4	-27.11	-18	171.13	-1.56002	440.36	-27.1102	-47.4064	221212	40.4	15.7	3.00212	-27.0519	-1.35909
17	P2	0.62	43.8765	-1.73868	418.42	-28.1343	-47.8817	44.0674	-1.73669	420.068	-28.1293	-47.882	221212	67.7529	7.10765	11.1211	-28.0719	-1.53028
18	PAND04	0.88	14.0726	7.94003	403.603	-12.5921	-48.0596	14.1957	7.94406	406.795	-12.5818	-48.0602	221212	46.2267	1.61314	33.4323	-12.5087	7.84976
19	PAND05	0.93	15.3191	8.1821	426.634	-12.4646	-47.7306	15.5208	8.18814	431.716	-12.4492	-47.7315	221212	46.4211	1.6689	32.4512	-12.376	8.08626
20	PAND06	0.93	15.8733	8.44989	440.284	-12.5203	-47.7892	16.1533	8.45795	447.305	-12.4997	-47.7904	221212	48.0973	1.73691	32.3065	-12.4265	8.34769
21	PEA	0.91	112.331	1.54089	441.264	-26.6009	-48.1569	114.818	1.5509	450.095	-26.5756	-48.1584	221212	49.461	12.6174	4.57341	-26.5167	1.65519
22	Glutamic A	1.22	103.425	-1.87459	450.38	-10.7404	-47.9438	106.186	-1.86262	461.24	-10.7095	-47.9456	221212	37.8065	8.70377	5.06765	-10.6345	-1.6523
23	SALANINE	1.08	167.319	-1.66166	429.432	-27.1346	-47.5119	172.553	-1.64769	441.561	-27.0992	-47.514	221212	40.8852	15.9771	2.98548	-27.0408	-1.44404
24	ALANINE	1.04	15.7	-1.56	40.4	-27.11	-18	163.28	-1.56002	420.16	-27.1102	-47.4064	221212	40.4	15.7	3.00212	-27.0519	-1.35909
25	PAND07	0.88	18.6657	9.47639	490.26	-12.376	-47.8946	18.5689	9.47476	488.039	-12.3828	-47.6721	221212	55.459	2.1101	30.6631	-12.3095	9.33291
26	PAND08	0.93	19.0301	8.59255	497.684	-12.3848	-48.9747	18.8337	8.58929	493.196	-12.3983	-48.5301	221212	53.0318	2.02513	30.5513	-12.3251	8.47495
27	PAND09	0.92	18.0442	8.1298	496.782	-12.3344	-48.6686	17.7663	8.12491	490.093	-12.3547	-48.0012	221212	53.2709	1.93112	32.183	-12.2814	8.02499
28	Leucine	0.79	88.9805	6.48103	461.433	-28.3539	-48.508	87.1628	6.47451	453.185	-28.3812	-47.6178	221212	57.3652	11.0333	6.06585	-28.3241	6.42586
29	SEAL	1.07	171.499	15.8996	469.923	-12.6653	-48.3919	167.142	15.8914	459.47	-12.6993	-47.2788	221212	42.9411	15.6207	3.20715	-12.6264	15.5502
30	P2	0.61	46.767	-1.69068	438.349	-28.1153	-48.3901	45.3484	-1.70038	426.7	-28.1562	-47.0541	221212	69.9508	7.43417	10.9776	-28.0989	-1.4951
31	SALANINE	1.06	172.354	-1.64175	443.316	-27.007	-49.0317	166.285	-1.65307	429.632	-27.0547	-47.4737	221212	40.5314	15.6873	3.01432	-26.9963	-1.44925
32	ALANINE	1.12	15.7	-1.56	40.4	-27.11	-18	175.84	-1.56002	452.48	-27.1102	-47.4064	221212	40.4	15.7	3.00212	-27.0519	-1.35909
33	PEA	0.92	112.927	1.604	446.068	-26.5491	-46.3447	113.08	1.6244	446.407	-26.5436	-46.5177	221212	48.5224	12.2913	4.60566	-26.4847	1.7264
34	PANH01DA	1.07	13.5015	7.96373	449.796	-12.8971	-46.5583	13.5382	8.00478	450.478	-12.8861	-46.9042	221212	42.1008	1.26525	38.8203	-12.8134	7.9086
35	PANH01DB	1.07	13.9828	7.29181	448.836	-12.9705	-46.7666	14.04	7.35335	449.858	-12.954	-47.2853	221212	42.0428	1.31215	37.3814	-12.8813	7.2774
36	PANH02	1.06	13.6351	7.57322	447.092	-12.6743	-46.7959	13.7095	7.6553	448.451	-12.6524	-47.4873	221212	42.3067	1.29335	38.1629	-12.5793	7.56997
37	PANH03	1.07	12.4991	6.88546	441.325	-12.7409	-46.2922	12.5844	6.98799	443.003	-12.7134	-47.1568	221212	41.4021	1.17612	41.0695	-12.6405	6.92339
38	Glutamic A	1.24	103.179	-2.07773	453.366	-10.6749	-46.0854	104.025	-1.95578	455.436	-10.642	-47.1229	221212	36.7287	8.38915	5.1078	-10.5669	-1.74256
39	SALANINE	1.07	165.551	-1.79052	429.032	-27.125	-45.9959	167.139	-1.6482	431.319	-27.0865	-47.2062	221212	40.3102	15.6204	3.0107	-27.0281	-1.44454
40	ALANINE	1.06	15.7	-1.56	40.4	-27.11	-18	166.42	-1.56002	428.24	-27.1102	-47.4064	221212	40.4	15.7	3.00212	-27.0519	-1.35909
41	PAND13	0.75	18.2854	8.35165	462.401	-12.3343	-48.0275	18.2923	8.34567	462.54	-12.3522	-47.8683	221212	61.672	2.43897	29.5005	-12.2789	8.23889
42	PAND14	0.74	18.3949	8.67698	457.627	-12.4836	-48.7032	18.4088	8.66501	457.903	-12.5194	-48.385	221212	61.8787	2.48768	29.0197	-12.4462	8.54832
43	PAND15	0.74	18.326	9.4119	453.939	-12.3742	-49.4008	18.3468	9.39393	454.349	-12.4279	-48.9237	221212	61.3985	2.4793	28.8919	-12.3547	9.25459
44	Leucine	0.81	87.477	6.41149	454.653	-28.1765	-49.2199	87.6093	6.3876	455.201	-28.2473	-48.5836	221212	56.1977	10.816	6.06177	-28.1901	6.34165
45	SEAL	1.01	153.718	15.9569	425.639	-12.6146	-48.3328	154.009	15.9268	426.28	-12.7041	-47.5365	221212	42.206	15.2484	3.2292	-12.6311	15.5845
46	P2	0.67	47.4194	-1.30711	446.353	-28.0748	-48.817	47.527	-1.34266	447.16	-28.1811	-47.8618	221212	66.7402	7.09358	10.9766	-28.1238	-1.14849
47	SALANINE	1.03	163.871	-1.51814	422.87	-26.9979	-49.5067	164.305	-1.55961	423.762	-27.122	-48.3929	221212	41.1419	15.9519	3.00897	-27.0636	-1.3587
48	ALANINE	1.09	15.7	-1.56	40.4	-27.11	-18	171.13	-1.56002	440.36	-27.1102	-47.4064	221212	40.4	15.7	3.00212	-27.0519	-1.35909
49	PEA	0.89	114.064	1.82782	448.769	-26.7217	-47.0839	114.001	1.83839	448.495	-26.7274	-47.118	221212	50.3927	12.8091	4.58982	-26.6687	1.93375
50	PAND10	0.74	17.8038	9.05098	453.387	-12.4898	-47.2369	17.7843	9.07228	452.834	-12.5015	-47.3049	221212	61.1938	2.40328	29.7064	-12.4283	8.94294
51	PAND11	0.74	18.0145	9.3498	452.399	-12.3743	-47.7903	17.9849	9.38176	451.572	-12.3918	-47.8923	221212	61.0232	2.43039	29.2932	-12.3186	9.2428
52	PAND12	0.73	17.291	9.84398	449.461	-12.4322	-48.4073	17.2531	9.88661	448.365	-12.4556	-48.5433	221212	61.4199	2.36343	30.3188	-12.3824	9.73197
53	Glutamic A	1.24	104.676	-2.074	458.531	-10.8493	-48.3562	104.389	-2.02135	457.135	-10.8786	-48.5262	221212	36.8657	8.41845	5.10901	-10.8038	-1.80609
54	Leucine	0.8	84.9016	6.16453	441.939	-28.4392	-47.4703	84.6223	6.22824	440.325	-28.4736	-47.6744	221212	55.0407	10.5778	6.07066	-28.4167	6.18724
55	SALANINE	1.06	171.357	-1.65746	440.448	-27.1172	-47.3065	170.7	-1.58371	438.573	-27.1575	-47.5447	221212	41.3748	16.1038	2.99748	-27.0991	-1.38205
56	ALANINE	1.07	15.7	-1.56	40.4	-27.11	-18	167.99	-1.56002	432.28	-27.1102	-47.4064	221212	40.4	15.7	3.00212	-27.0519	-1.35909
57	SEAL	1.05	157.519	16.12	434.588	-12.8331	-47.1365	157.654	16.1172	435.145	-12.8334	-47.062	221212	41.4424	15.0146	3.22015	-12.7606	15.7691
58	PANH04	0.92	13.0793	8.08551	441.83	-13.0247	-47.6357	13.1016	8.08013	442.964	-13.0254	-47.4869	221212	48.1483	1.42409	39.4448	-12.9527	7.9816
59	PANH06DA	0.91	13.3191	7.40726	441.169	-13.0273	-48.1106	13.3533	7.39919	442.87	-13.0283	-47.8875	221212	48.667	1.46739	38.6932	-12.9557	7.32181
60	PANH06DB	0.92	13.0073	7.57016	436.419	-12.9979	-47.6422	13.0518	7.5594	438.665	-12.9993	-47.3444	221212	47.681	1.41868	39.2111	-12.9267	7.47705
61	PANH05	0.9	12.6805	7.28862	436.596	-12.9911	-48.0096	12.7348	7.27517	439.408	-12.9929	-47.6376	221212	48.8231	1.41497	40.2553	-12.9202	7.20165
62	P2	0.63	44.9518	-1.34308	421.576	-28.3099	-47.6795	45.1828	-1.35908	424.839	-28.3122	-47.2328	221212	67.4347	7.17187	10.9698	-28.2551	-1.1644
63	SALANINE	1.14	174.988	-1.56592	450.141	-27.0657	-48.6796	176.038	-1.58459	454.211	-27.0684	-48.159	221212	39.8431	15.4419	3.01022	-27.01	-1.3829
64	ALANINE	1.14	15.7	-1.56	40.4	-27.11	-18	178.98	-1.56002	460.56	-27.1102	-47.4064	221212	40.4	15.7	3.00212	-27.0519	-1.35909
65	PEA	0.89	112.209	1.61892	442.92	-26.6131	-46.8827	111.97	1.61492	441.976	-26.6297	-46.9131	221212	49.6602	12.5809	4.60516	-26.5709	1.71722
66	Glutamic A	1.2	99.9695	-1.93229	439.3	-10.6913	-46.9512	99.5449	-1.94025	437.431	-10.7251	-47.012	221212	36.4526	8.29541	5.1267	-10.6501	-1.72751
67	PANH07	0.9	14.5671	8.33072	472.512	-12.8685	-47.0411	14.4745	8.31866	469.504	-12.9191	-47.1324	221212	52.1671	1.60827	37.8428	-12.8463	8.21273
68	PANH08	0.89	15.5385	8.76	491.385	-12.8309	-47.5702	15.4071	8.74392	487.222	-12.8984	-47.6918	221212	54.7441	1.73113	36.8938	-12.8257	8.62478
69	PANH09	0.91	14.9165	9.0539	483.15	-12.8627	-48.2744	14.7592	9.0338	478.044	-12.9471	-48.4263	221212	52.5324	1.62189	37.7879	-12.8744	8.90565
70	SALANINE	1.07	168.574	-1.59647	435.272	-27.1433	-47.4158	166.444	-1.62035	429.765	-27.2431	-47.5982	221212	40.165	15.5555	3.01237	-27.1848	-1.41755
71	ALANINE	1.15	15.7	-1.56	40.4	-27.11	-18	180.55	-1.56002	464.6	-27.1102	-47.4064	221212	40.4	15.7	3.00212	-27.0519	-1.35909
72	Leucine	0.77	80.564	6.40372	421.992	-28.4421	-47.1413	80.6892	6.40493	422.612	-28.4262	-47.1327	221212	54.8846	10.4791	6.11044	-28.3692	6.35844
73	PANH10	0.66	13.5573	8.63478	385.927	-12.977	-46.9391	13.5996	8.63721	387.062	-12.9449	-46.9218	221212	58.6457	2.06054	33.2049	-12.8721	8.52138
74	PANH11	0.66	12.4395	8.71928	382.51	-13.1327	-47.2959	12.4977	8.72292	384.2	-13.0846	-47.2699	221212	58.2121	1.89359	35.8652	-13.012	8.60442
75	PANH12	0.67	13.4345	9.16071	390.789	-12.9606	-47.2035	13.5184	9.16557	393.093	-12.8964	-47.1688	221212	58.6707	2.01768	33.9247	-12.8236	9.03332
76	SEAL	1.04	160.257	16.0202	440.985	-13.0285	-48.2407	161.51	16.0263	444.24	-12.9482	-48.1974	221212	42.7154	15.5298	3.20897	-12.8755	15.681
77	P2	0.65	45.4197	-1.40251	428.599	-28.3929	-48.1737	45.8467	-1.39531	432.402	-28.2979	-48.1217	221212	66.5233	7.05334	11.0034	-28.2408	-1.1995
78	SALANINE	1.07	160.894	-1.64749	415.725	-27.2452	-48.6859	162.661	-1.63909	420.035	-27.1344	-48.6253	221212	39.2556	15.202	3.01265	-27.076	-1.43571
79	ALANINE	1.07	15.7	-1.56	40.4	-27.11	-18	167.99	-1.56002	432.28	-27.1102	-47.4064	221212	40.4	15.7	3.00212	-27.0519	-1.35909
80	PEA	0.95	120.9	1.8035	475.709	-26.502	-47.7892	120.492	1.80478	474.232	-26.4878	-47.8188	221212	49.9191	12.6833	4.59177	-26.4288	1.90119
81	PANH13	0.67	14.7581	9.18454	395.156	-12.8931	-46.9085	14.6588	9.18713	392.709	-12.8642	-46.9678	221212	58.6133	2.18789	31.2549	-12.7914	9.05421
82	PANH15	0.68	15.5779	9.61079	408.3	-12.7307	-47.8095	15.4212	9.61468	404.519	-12.6875	-47.8983	221212	59.488	2.26782	30.6033	-12.6145	9.46848
83	PANH14DA	0.66	14.882	9.4824	402.114	-12.9075	-47.9847	14.6831	9.48758	397.165	-12.8499	-48.1032	221212	60.1765	2.22472	31.5572	-12.7771	9.34533
84	PANH14DB	0.67	15.1148	9.79094	410.596	-12.8521	-48.2123	14.8631	9.79742	404.298	-12.78	-48.3604	221212	60.343	2.21837	31.7351	-12.7072	9.64555
85	SALANINE	1.06	168.536	-1.48779	434.503	-27.0999	-48.4701	165.179	-1.4801	426.529	-27.0146	-48.6477	221212	40.2386	15.583	3.01259	-26.9561	-1.28166
86	ALANINE	1.02	15.7	-1.56	40.4	-27.11	-18	160.14	-1.56002	412.08	-27.1102	-47.4064	221212	40.4	15.7	3.00212	-27.0519	-1.35909

## Sheet: Panicum_Nitrogen runset
Ps	ID	Wt	NugR	d15NR	CugR	d13CR	d18OR	Nugdc	d15Ndc	Cugdc	d13Cdc	d18Odc	Runfile	pcC	pcN	CN	normd15N
2	ALANINE	0.47	15.7	-1.56	40.4	-27.11	-18	73.79	-1.56002	189.88	-27.1102	-47.4064	230103	40.4	15.7	3.00212	-1.53702
3	ALANINE	0.46	68.9223	-0.891092	199.768	-27.1834	-47.7302	72.8096	-1.13459	200.319	-27.1915	-47.9375	230103	43.5477	15.8282	3.20982	-1.10887
4	ALANINE	0.5	64.4786	-0.563543	204.705	-26.8215	-48.0234	72.1866	-1.05058	205.837	-26.8378	-48.4379	230103	41.1674	14.4373	3.3267	-1.02432
5	ALANINE	0.46	56.1357	-0.51278	187.091	-27.0385	-48.4157	66.8416	-1.2432	188.647	-27.0629	-49.037	230103	41.0102	14.5308	3.29268	-1.21817
6	ALANINE	0.48	56.5127	-0.305153	193.727	-27.0515	-47.4555	71.8587	-1.27901	195.882	-27.084	-48.2846	230103	40.8088	14.9706	3.18026	-1.25421
7	ALANINE	0.47	15.7	-1.56	40.4	-27.11	-18	73.79	-1.56002	189.88	-27.1102	-47.4064	230103	40.4	15.7	3.00212	-1.53702
8	ALANINE	0.5	80.9586	-1.50283	209.55	-26.9597	-47.8609	81.0395	-1.53862	209.377	-26.9962	-47.9056	230103	41.8755	16.2079	3.01426	-1.51549
9	Glutamic A	0.98	84.702	-1.65171	368.621	-10.5029	-48.3817	84.8713	-1.72327	368.015	-10.5772	-48.4711	230103	37.5525	8.66034	5.05884	-1.70132
10	PAND01	4.47	82.5471	9.7739	1731.05	-15.0037	-52.2782	82.795	9.66533	1726.78	-15.1147	-52.4117	230103	38.6304	1.85224	24.3321	9.76027
11	PAND02	4.45	79.4409	9.7843	1713.44	-15.4098	-52.4514	79.7592	9.63955	1707.81	-15.5578	-52.6293	230103	38.3778	1.79234	24.9807	9.73432
12	PAND03	4.45	81.0609	9.54972	1370.06	-23.7371	-53.165	81.4674	9.36883	1364.44	-23.9205	-53.3873	230103	30.6616	1.83073	19.5397	9.46187
13	Leucine	0.75	81.0189	6.57864	423.533	-27.6038	-49.855	81.507	6.36222	421.45	-27.8231	-50.1227	230103	56.1933	10.8676	6.0325	6.43599
14	SEAL	0.47	74.7668	16.154	209.388	-12.3952	-47.7521	75.2927	15.8991	208.187	-12.6549	-48.065	230103	44.2952	16.0197	3.22588	16.034
15	SALANINE	0.48	76.398	-1.23867	199.804	-26.6797	-48.0738	77.0128	-1.52497	198.496	-26.9723	-48.4313	230103	41.3533	16.0443	3.00701	-1.50175
16	ALANINE	0.47	15.7	-1.56	40.4	-27.11	-18	73.79	-1.56002	189.88	-27.1102	-47.4064	230103	40.4	15.7	3.00212	-1.53702
17	P2	1.04	82.0776	-1.56798	739.114	-27.6645	-49.9842	81.9788	-1.57232	738.212	-27.6881	-50.1047	230103	70.9819	7.88257	10.5057	-1.5494
18	PAND04	3.71	75.9419	10.0266	1728.33	-12.1159	-52.3517	75.7593	10.0178	1724.12	-12.1639	-52.5921	230103	46.4723	2.04203	26.5509	10.115
19	PAND05	3.73	78.0242	9.91742	1636.26	-14.6642	-52.3824	77.7432	9.90424	1630.29	-14.7361	-52.7429	230103	43.7074	2.08427	24.4652	10.0007
20	PAND06	3.72	77.7508	10.0057	1742.18	-12.7906	-52.1722	77.3779	9.98817	1733.71	-12.8866	-52.6529	230103	46.6051	2.08005	26.1401	10.0852
21	PEA	0.63	81.8129	1.62251	322.632	-26.2807	-48.4585	81.323	1.60073	320.673	-26.3989	-49.0616	230103	50.9005	12.9084	4.60041	1.64398
22	Glutamic A	0.92	79.8925	-1.59706	345.942	-10.3432	-48.096	79.3191	-1.62311	343.425	-10.4875	-48.8199	230103	37.3288	8.62164	5.05128	-1.60052
23	SALANINE	0.47	74.9422	-1.38983	193.23	-27.1205	-47.2494	74.3154	-1.42024	191.592	-27.2858	-48.0946	230103	40.7642	15.8118	3.00777	-1.39635
24	ALANINE	0.5	42.004	-1.45146	107.533	-27.2558	-48.2277	41.603	-1.48621	106.492	-27.4447	-49.1926	230103	21.2984	8.3206	2.98634	-1.46274
25	PAND07	3.77	94.6869	10.2445	1732.67	-17.8238	-52.1137	93.671	10.205	1713.83	-18.0386	-53.1947	230103	45.4596	2.48464	21.3456	10.3034
26	PAND08	3.7	89.2222	10.0491	1870.41	-13.3083	-52.0256	88.16	10.0052	1847.84	-13.5482	-53.2266	230103	49.9416	2.3827	24.4534	10.1023
27	PAND09	3.77	91.2106	9.9463	1674.79	-18.954	-52.4864	90.0174	9.89798	1652.58	-19.2162	-53.8067	230103	43.835	2.38773	21.4182	9.99441
28	Leucine	0.75	81.8902	6.41653	424.56	-27.8138	-48.4385	80.723	6.364	418.426	-28.0969	-49.8848	230103	55.7901	10.7631	6.04739	6.43778
29	SEAL	0.47	74.1173	16.013	205.237	-12.5944	-47.1594	72.9742	15.9556	202.029	-12.9064	-48.7281	230103	42.9848	15.5264	3.22991	16.0908
30	P2	1.01	78.3094	-1.32442	706.32	-27.4201	-49.024	77.0103	-1.38523	694.443	-27.7506	-50.7099	230103	68.7567	7.62478	10.5205	-1.36112
31	SALANINE	0.47	54.5723	-1.28853	141.053	-26.9923	-46.7854	53.6035	-1.35369	138.515	-27.3464	-48.5957	230103	29.4712	11.405	3.01474	-1.32937
32	ALANINE	0.48	74.6326	-1.3141	192.852	-26.7835	-46.2178	73.221	-1.3836	189.154	-27.1612	-48.1497	230103	39.4071	15.2544	3.01389	-1.35947
33	PEA	0.63	81.3309	1.96711	318.997	-26.2924	-46.4266	79.6983	1.89303	312.507	-26.694	-48.4786	230103	49.6042	12.6505	4.57464	1.93815
34	PANH01DA	4.95	79.1406	9.79637	736.818	-64.1794	-58.4755	77.4606	9.71732	720.965	-64.587	-60.6205	230103	14.5649	1.56486	10.8588	9.81258
35	PANH01DB	4.91	77.4095	9.70038	1257.57	-32.2823	-54.0339	75.677	9.61694	1229.04	-32.7286	-56.3084	230103	25.0315	1.54128	18.9474	9.71157
36	PANH02	4.92	78.2788	9.54023	1245.05	-32.7856	-53.9711	76.4367	9.45241	1215.36	-33.255	-56.3652	230103	24.7024	1.55359	18.5502	9.54599
37	PANH03	4.91	80.3327	9.41594	1208.69	-34.1672	-54.0869	78.3502	9.32374	1178.45	-34.6594	-56.6001	230103	24.0011	1.59573	17.5477	9.41649
38	Glutamic A	0.96	83.8164	-1.8035	364.946	-9.84381	-48.0022	81.6519	-1.89901	355.394	-10.3733	-50.6517	230103	37.0202	8.5054	5.07798	-1.87819
39	SALANINE	0.45	72.8753	-1.66698	188.017	-26.625	-45.7526	70.9101	-1.76685	182.879	-27.1681	-48.5287	230103	40.6397	15.7578	3.00886	-1.74518
40	ALANINE	0.45	15.7	-1.56	40.4	-27.11	-18	70.65	-1.56002	181.8	-27.1102	-47.4064	230103	40.4	15.7	3.00212	-1.53702
41	PAND13	2.58	74.7615	10.1629	1579.94	-11.7753	-53.3006	74.54	10.1392	1575.15	-11.7204	-53.4212	230103	61.0524	2.88915	24.6536	10.2372
42	PAND14	2.63	75.3577	10.206	1611.12	-11.5729	-53.6798	74.9124	10.1585	1601.38	-11.4631	-53.921	230103	60.8888	2.84838	24.9394	10.2566
43	PAND15	2.6	76.0084	10.03	1618.54	-11.5253	-53.9719	75.3367	9.95883	1603.89	-11.3606	-54.3335	230103	61.6882	2.89756	24.838	10.0556
44	Leucine	0.78	82.8926	6.58819	429.153	-28.2239	-50.2488	81.9187	6.49356	423.992	-28.0074	-50.7328	230103	54.3579	10.5024	6.03839	6.56817
45	SEAL	0.47	77.8166	16.1941	214.964	-12.9107	-48.0747	76.6771	16.0747	211.743	-12.6364	-48.681	230103	45.0516	16.3143	3.22173	16.2107
46	PEA	0.63	78.8806	1.89449	309.219	-26.6364	-48.6654	77.4986	1.75322	303.674	-26.3111	-49.3924	230103	48.2023	12.3014	4.57152	1.79745
47	SALANINE	0.49	75.1322	-1.57192	193.934	-27.3782	-47.5634	73.601	-1.73616	189.889	-26.9989	-48.4124	230103	38.7528	15.0206	3.00997	-1.71429
48	ALANINE	0.46	15.7	-1.56	40.4	-27.11	-18	72.22	-1.56002	185.84	-27.1102	-47.4064	230103	40.4	15.7	3.00212	-1.53702
49	P2	1.02	75.8066	-1.52504	685.095	-27.4032	-50.7465	76.1627	-1.50317	688.086	-27.4304	-50.7554	230103	67.4594	7.46693	10.5402	-1.47981
50	PAND10	2.68	72.373	9.924	1593.6	-11.1949	-54.9057	73.0561	9.96824	1607.58	-11.25	-54.9235	230103	59.9843	2.72597	25.6722	10.0651
51	PAND11	2.62	72.143	9.96888	1558.87	-11.0929	-54.7358	73.1692	10.0352	1579.46	-11.1757	-54.7624	230103	60.2848	2.79272	25.1842	10.1325
52	PAND12	2.63	70.9426	9.82117	1581.03	-11.0625	-54.9832	72.2945	9.90965	1609	-11.1729	-55.0187	230103	61.1788	2.74884	25.9656	10.0061
53	Glutamic A	0.98	80.5082	-1.94562	350.749	-10.144	-51.0305	82.4352	-1.83632	358.541	-10.2821	-51.0751	230103	36.5858	8.41175	5.07426	-1.81509
54	Leucine	0.75	77.235	6.44602	399.574	-27.7056	-50.0009	79.464	6.5783	410.274	-27.8684	-50.0545	230103	54.7032	10.5952	6.02352	6.65345
55	SALANINE	0.47	69.1851	-1.6255	178.611	-26.7865	-47.5634	71.5258	-1.47241	184.216	-26.9766	-47.626	230103	39.1949	15.2183	3.00477	-1.44886
56	ALANINE	0.47	15.7	-1.56	40.4	-27.11	-18	73.79	-1.56002	189.88	-27.1102	-47.4064	230103	40.4	15.7	3.00212	-1.53702
57	SEAL	0.45	71.4781	16.1369	195.894	-12.8505	-46.388	71.5266	16.1251	195.871	-12.8455	-46.3885	230103	43.5269	15.8948	3.19484	16.2615
58	PANH04	4.8	85.7256	10.1762	230.141	-235.388	-94.2497	85.8419	10.1528	230.087	-235.38	-94.2507	230103	4.79349	1.78837	3.12709	10.2508
59	PANH06DA	4.78	85.3491	9.84229	748.122	-67.7807	-63.6918	85.523	9.80716	747.859	-67.7664	-63.6932	230103	15.6456	1.78918	10.202	9.90301
60	PANH06DB	4.8	85.5472	9.94285	493.854	-107.181	-69.2639	85.7797	9.89601	493.623	-107.163	-69.2658	230103	10.2838	1.78708	6.71363	9.99242
61	PANH05	4.78	83.5982	9.78944	509.56	-104.142	-68.7147	83.8824	9.7309	509.262	-104.119	-68.7171	230103	10.654	1.75486	7.083	9.82626
62	P2	1.05	79.2933	-1.55558	722.047	-27.3859	-53.1272	79.617	-1.62504	721.54	-27.3562	-53.1302	230103	68.7181	7.58257	10.5731	-1.60247
63	SALANINE	0.45	72.9556	-1.48029	187.922	-27.164	-49.7417	73.3033	-1.56133	187.768	-27.1293	-49.7452	230103	41.7263	16.2896	2.98845	-1.53834
64	ALANINE	0.47	15.7	-1.56	40.4	-27.11	-18	73.79	-1.56002	189.88	-27.1102	-47.4064	230103	40.4	15.7	3.00212	-1.53702
65	PEA	0.61	79.1411	1.75536	308.082	-26.4503	-48.0163	79.0473	1.77152	307.93	-26.4996	-47.9807	230103	50.4803	12.9586	4.54476	1.81587
66	Glutamic A	0.94	79.5262	-1.70443	341.407	-10.3661	-48.4503	79.3378	-1.67221	341.07	-10.4662	-48.3792	230103	36.284	8.44019	5.01545	-1.64993
67	PANH07	4.73	94.4734	10.1781	286.432	-200.134	-88.0929	94.1381	10.227	286.008	-200.257	-87.9908	230103	6.04668	1.99023	3.54454	10.3255
68	PANH08	4.76	100.107	9.78337	-88.2254	1386.67	174.446	99.6336	9.84855	-88.0378	1386.21	174.622	230103	-1.84953	2.09314	-1.03089	9.94466
69	PANH09	4.69	90.6799	10.0445	442.366	-124.577	-73.1178	90.1448	10.126	441.276	-124.8	-72.9447	230103	9.40887	1.92206	5.71105	10.2239
70	SALANINE	0.48	76.4706	-1.66449	197.036	-26.6024	-49.6882	75.9297	-1.56783	196.454	-26.898	-49.4752	230103	40.9279	15.8187	3.01853	-1.54488
71	ALANINE	0.49	15.7	-1.56	40.4	-27.11	-18	76.93	-1.56002	197.96	-27.1102	-47.4064	230103	40.4	15.7	3.00212	-1.53702
72	Leucine	0.78	83.4312	6.62278	429.995	-28.2888	-49.2245	83.5963	6.61505	431.04	-28.2915	-49.3804	230103	55.2615	10.7175	6.01558	6.69044
73	PANH10	2.84	69.3295	10.2061	1685.12	-11.8743	-54.6038	69.6045	10.1906	1693.33	-11.8801	-54.9137	230103	59.6242	2.45086	28.3825	10.2889
74	PANH11	2.91	67.341	10.275	1716.24	-11.9251	-55.0681	67.7424	10.2517	1728.81	-11.9338	-55.5325	230103	59.4092	2.32792	29.7737	10.3504
75	PANH12	2.81	67.6087	10.0721	1647.95	-12.329	-55.1773	68.1472	10.0411	1664.08	-12.3406	-55.7964	230103	59.2199	2.42517	28.4887	10.1385
76	SEAL	0.49	74.7324	16.0018	205.898	-12.9446	-49.3028	75.4779	15.9628	208.423	-12.9589	-50.0813	230103	42.5353	15.4037	3.22161	16.0981
77	P2	1.01	77.3709	-1.5174	701.227	-27.7673	-51.5938	78.2989	-1.56339	711.573	-27.7838	-52.5256	230103	70.4528	7.75237	10.6025	-1.54041
78	SALANINE	0.48	71.7982	-1.39976	184.986	-27.3758	-49.0834	72.8049	-1.45341	188.178	-27.395	-50.1732	230103	39.2038	15.1677	3.01548	-1.42973
79	ALANINE	0.5	15.7	-1.56	40.4	-27.11	-18	78.5	-1.56002	202	-27.1102	-47.4064	230103	40.4	15.7	3.00212	-1.53702
80	PEA	0.65	83.7514	1.91338	328.089	-26.7036	-48.9339	83.7972	1.9229	328.153	-26.6576	-48.8159	230103	50.4851	12.8919	4.56871	1.96822
81	PANH13	2.84	74.2553	10.1318	1731.22	-12.0018	-56.1108	74.3365	10.151	1731.89	-11.9083	-55.8765	230103	60.9821	2.61748	27.181	10.2491
82	PANH15	2.84	76.6655	10.1897	1727.82	-11.8008	-56.3276	76.7912	10.2185	1728.84	-11.6605	-55.9761	230103	60.8746	2.70392	26.2657	10.317
83	PANH14DA	2.82	73.9575	10.0654	1729.8	-11.9059	-56.6307	74.1193	10.1038	1731.15	-11.7189	-56.1622	230103	61.3883	2.62835	27.249	10.2016
84	PANH14DB	2.86	74.8303	9.9973	1742.39	-12.1341	-56.767	75.0351	10.0453	1744.1	-11.9003	-56.1814	230103	60.9825	2.62361	27.1177	10.1426
85	SALANINE	0.5	79.0084	-1.57769	204.476	-27.1429	-49.8725	79.2681	-1.52078	204.717	-26.8668	-49.1646	230103	40.9433	15.8536	3.01302	-1.49754
86	ALANINE	0.49	15.7	-1.56	40.4	-27.11	-18	76.93	-1.56002	197.96	-27.1102	-47.4064	230103	40.4	15.7	3.00212	-1.53702

## Sheet: Setaria_Carbon runset
Ps	ID	Wt	NugR	d15NR	CugR	d13CR	d18OR	Nugdc	d15Ndc	Cugdc	d13Cdc	d18Odc	Runfile	pcC	pcN	CN	normd13C	normd15N
2	ALANINE	1.14	15.7	-1.56	40.4	-27.11	-18	178.98	-1.56002	460.56	-27.1102	-47.4064	221208	40.4	15.7	3.00212	-27.1362	-1.56355
3	ALANINE	1.04	160.657	-1.68497	417.756	-27.1508	-49.9798	161.369	-1.67925	418.193	-27.1507	-49.2864	221208	40.2108	15.5163	3.02344	-27.1768	-1.68412
4	ALANINE	1.01	156.369	-1.58026	410.914	-27.18	-50.7986	157.761	-1.56881	411.774	-27.1798	-49.412	221208	40.7697	15.6199	3.04512	-27.2058	-1.57244
5	ALANINE	1.04	158.374	-1.60286	416.278	-27.1416	-51.8456	160.498	-1.58569	417.586	-27.1413	-49.7665	221208	40.1525	15.4325	3.03545	-27.1673	-1.58951
6	ALANINE	1.08	163.52	-1.57558	429.82	-27.0199	-51.9367	166.458	-1.55268	431.621	-27.0195	-49.1628	221208	39.9649	15.4128	3.02514	-27.0454	-1.55614
7	ALANINE	1.13	71.3885	-1.3237	190.346	-27.6229	-51.4056	72.9989	-1.29507	191.345	-27.6226	-47.9338	221208	16.9332	6.46008	3.05807	-27.649	-1.29564
8	ALANINE	1.12	15.7	-1.56	40.4	-27.11	-18	175.84	-1.56002	452.48	-27.1102	-47.4064	221208	40.4	15.7	3.00212	-27.1362	-1.56355
9	Glutamic A	1.23	104.834	-1.75463	456.712	-10.5865	-48.6136	105.142	-1.73952	457.811	-10.5997	-48.41	221208	37.2204	8.54817	5.0799	-10.611	-1.74507
10	SETD15	0.77	31.3422	14.1714	465.196	-12.0357	-48.9296	31.5271	14.2021	467.441	-12.0621	-48.5225	221208	60.7066	4.09443	17.2977	-12.0748	14.3751
11	SETD14	0.74	28.6845	14.6989	429.497	-12.1002	-49.3189	28.9391	14.7449	432.613	-12.1398	-48.7084	221208	58.4612	3.91069	17.4406	-12.1525	14.924
12	SETD13	0.76	30.476	14.8309	459.795	-11.9852	-49.5411	30.8378	14.8923	464.253	-12.0379	-48.7271	221208	61.086	4.0576	17.5638	-12.0506	15.073
13	Leucine	0.81	86.5584	6.28552	450.394	-28.2304	-49.7594	87.8465	6.36165	455.867	-28.2958	-48.7419	221208	56.2798	10.8452	6.05425	-28.3228	6.44683
14	SEAL	1.08	163.088	15.8598	452.265	-12.7006	-49.1652	166.009	15.952	458.876	-12.7796	-47.9431	221208	42.4885	15.3712	3.22485	-12.7929	16.1446
15	SALANINE	1.03	160.7	-1.70566	416.093	-26.9747	-49.0239	164.068	-1.59992	423.206	-27.0664	-47.5976	221208	41.088	15.929	3.00936	-27.0924	-1.60391
16	ALANINE	1.04	15.7	-1.56	40.4	-27.11	-18	163.28	-1.56002	420.16	-27.1102	-47.4064	221208	40.4	15.7	3.00212	-27.1362	-1.56355
17	P2	0.63	46.6718	-1.27709	434.183	-28.2554	-47.3519	46.6274	-1.24663	433.624	-28.2452	-47.3638	221208	68.8292	7.40117	10.8497	-28.2722	-1.24666
18	SETD12	0.76	29.2244	14.4278	458.117	-12.3275	-48.4069	29.1687	14.4897	456.939	-12.3067	-48.4307	221208	60.1236	3.83798	18.2763	-12.3196	14.6659
19	SETD11	0.77	29.1906	14.3552	447.47	-12.11	-48.1433	29.1073	14.4481	445.747	-12.0789	-48.179	221208	57.8892	3.78017	17.8662	-12.0916	14.6238
20	SETD10	0.77	29.2937	14.092	456.625	-12.0146	-48.3305	29.1823	14.2157	454.284	-11.9731	-48.3781	221208	58.9979	3.78991	18.1616	-11.9857	14.3888
21	PEA	0.92	117.583	1.72945	463.162	-26.5544	-48.4204	117.025	1.88222	460.197	-26.5032	-48.4799	221208	50.0214	12.7201	4.58788	-26.5287	1.91724
22	Glutamic A	1.19	100.941	-1.75314	439.503	-10.6583	-47.819	100.366	-1.57045	436.13	-10.596	-47.8904	221208	36.6496	8.43414	5.06962	-10.6074	-1.5741
23	SALANINE	1.02	157.456	-1.84202	406.943	-27.1978	-47.0522	156.411	-1.62889	403.304	-27.1262	-47.1357	221208	39.5397	15.3344	3.00824	-27.1522	-1.6332
24	ALANINE	1.07	15.7	-1.56	40.4	-27.11	-18	167.99	-1.56002	432.28	-27.1102	-47.4064	221208	40.4	15.7	3.00212	-27.1362	-1.56355
25	SETD09	0.89	29.3011	14.0185	463.668	-12.2044	-47.5521	29.302	14.0069	463.556	-12.222	-47.5374	221208	52.085	3.29236	18.4566	-12.2348	14.1777
26	SETD08	0.9	26.811	14.266	445.843	-12.0291	-47.6808	26.8126	14.2429	445.628	-12.0644	-47.6514	221208	49.5143	2.97918	19.3901	-12.0771	14.4163
27	SETD07	0.9	37.307	13.9043	603.193	-11.8745	-48.5574	37.3103	13.8696	602.756	-11.9274	-48.5133	221208	66.9729	4.14559	18.8477	-11.9399	14.0388
28	Leucine	0.8	85.9178	6.293	449.017	-28.1874	-48.0028	85.9281	6.24702	448.584	-28.2569	-47.9441	221208	56.0729	10.741	6.09053	-28.2839	6.33092
29	SEAL	1.06	166.766	16.0689	460.247	-12.4453	-47.7105	166.791	16.0109	459.692	-12.5334	-47.6371	221208	43.3671	15.735	3.21544	-12.5465	16.2042
30	P2	0.65	48.2732	-1.18232	443.291	-28.075	-48.2154	48.2818	-1.25077	442.65	-28.1792	-48.1273	221208	68.0999	7.42797	10.696	-28.2062	-1.25084
31	SALANINE	1.08	169.245	-1.57031	435.801	-27.0298	-48.4719	169.28	-1.65014	435.065	-27.1515	-48.3692	221208	40.2838	15.6741	2.99844	-27.1775	-1.65469
32	ALANINE	1.06	15.7	-1.56	40.4	-27.11	-18	166.42	-1.56002	428.24	-27.1102	-47.4064	221208	40.4	15.7	3.00212	-27.1362	-1.56355
33	PEA	0.93	117.343	1.69033	460.705	-26.6071	-47.5293	117.648	1.70929	461.669	-26.6031	-47.6064	221208	49.6418	12.6503	4.57819	-26.6286	1.74236
34	SETD05DA	0.9	24.3276	13.4689	417.803	-12.2198	-47.3104	24.4542	13.5073	419.555	-12.2118	-47.4646	221208	46.6173	2.71714	20.0162	-12.2246	13.6725
35	SETD05DB	0.91	25.4788	13.6722	430.245	-12.1789	-47.1302	25.6783	13.7297	432.958	-12.1669	-47.3616	221208	47.5778	2.82179	19.671	-12.1796	13.8974
36	SETD06	0.88	22.7814	13.3353	402.435	-12.3366	-47.4807	23.0199	13.4121	405.826	-12.3206	-47.7892	221208	46.1166	2.61589	20.5676	-12.3335	13.5762
37	SETD04	0.86	23.9252	13.0607	403.195	-12.1843	-46.9324	24.239	13.1566	407.45	-12.1643	-47.3181	221208	47.3779	2.81849	19.6113	-12.177	13.3178
38	Glutamic A	1.22	101.096	-1.91851	443.587	-10.7021	-47.4168	102.692	-1.80516	449.217	-10.678	-47.8794	221208	36.8211	8.41738	5.10348	-10.6895	-1.81144
39	SALANINE	1.07	170.161	-1.65948	436.645	-27.0984	-47.3986	173.302	-1.5272	443.124	-27.0705	-47.9383	221208	41.4135	16.1965	2.9831	-27.0965	-1.53037
40	ALANINE	1.03	15.7	-1.56	40.4	-27.11	-18	161.71	-1.56002	416.12	-27.1102	-47.4064	221208	40.4	15.7	3.00212	-27.1362	-1.56355
41	SETD03	1	26.9761	13.095	439.108	-12.2895	-48.0539	26.8955	13.0747	437.996	-12.2906	-47.9923	221208	43.7996	2.68955	18.9993	-12.3034	13.2351
42	SETD02	0.99	24.6324	12.5157	427.795	-12.2694	-47.8545	24.4856	12.4751	425.634	-12.2715	-47.7312	221208	42.9934	2.47329	20.2802	-12.2843	12.6287
43	SETD01	1	26.7678	12.7635	433.177	-12.2932	-48.096	26.5291	12.7026	429.903	-12.2963	-47.911	221208	42.9903	2.65291	18.9057	-12.3092	12.8588
44	Leucine	0.82	89.4908	6.29299	463.864	-28.2638	-48.4577	88.4301	6.21235	459.202	-28.2681	-48.2111	221208	56.0002	10.7842	6.05829	-28.2951	6.29586
45	SEAL	1.01	162.165	16.0547	444.072	-12.7002	-47.854	159.769	15.9529	438.506	-12.7055	-47.5455	221208	43.4164	15.8187	3.20206	-12.7187	16.1455
46	P2	0.63	47.1527	-1.42133	435.169	-28.0556	-48.1279	46.3193	-1.54135	428.641	-28.062	-47.7578	221208	68.0382	7.35227	10.7964	-28.0888	-1.54468
47	SALANINE	1.08	174.778	-1.52663	448.842	-27.0663	-48.8847	171.185	-1.66664	441.006	-27.0737	-48.4533	221208	40.8339	15.8504	3.00557	-27.0997	-1.67138
48	ALANINE	1.02	15.7	-1.56	40.4	-27.11	-18	160.14	-1.56002	412.08	-27.1102	-47.4064	221208	40.4	15.7	3.00212	-27.1362	-1.56355
49	PEA	0.88	108.905	1.4449	431.063	-26.4945	-46.9802	108.88	1.4562	430.871	-26.5048	-47.061	221208	48.9626	12.3727	4.61686	-26.5303	1.48644
50	SETH15	0.69	24.0663	14.0468	408.976	-12.3227	-47.2007	24.0549	14.0697	408.612	-12.3436	-47.3621	221208	59.2191	3.48622	19.8178	-12.3565	14.2412
51	SETH14	0.73	28.0106	13.761	459.134	-12.2905	-48.0449	27.9908	13.7954	458.521	-12.3219	-48.2868	221208	62.8111	3.83435	19.1113	-12.3348	13.9638
52	SETH13	0.71	24.386	14.34	424.673	-12.4339	-48.3813	24.363	14.3858	423.918	-12.4758	-48.7037	221208	59.7067	3.4314	20.3001	-12.4888	14.5608
53	Glutamic A	1.2	102.048	-1.97638	447.739	-10.6275	-48.5384	101.927	-1.92006	446.743	-10.6799	-48.9412	221208	37.2286	8.49392	5.11347	-10.6914	-1.92763
54	Leucine	0.81	84.2552	6.04154	441.075	-28.1429	-47.2183	84.1358	6.10966	439.899	-28.2045	-47.7023	221208	54.3085	10.3871	6.09985	-28.2314	6.19202
55	SALANINE	1.06	167.001	-1.48006	429.621	-27.0369	-47.7756	166.725	-1.40118	428.285	-27.1088	-48.3399	221208	40.4042	15.7288	2.99695	-27.1348	-1.40294
56	ALANINE	1.07	15.7	-1.56	40.4	-27.11	-18	167.99	-1.56002	432.28	-27.1102	-47.4064	221208	40.4	15.7	3.00212	-27.1362	-1.56355
57	SEAL	1.1	167.078	16.097	460.193	-12.8183	-48.1668	162.825	16.0899	448.65	-12.8354	-47.9465	221208	40.7863	14.8022	3.21465	-12.8487	16.2841
58	SETH12	0.7	22.1796	14.6459	399.128	-12.5019	-47.5746	21.0783	14.6317	379.595	-12.536	-47.1338	221208	54.2278	3.01118	21.0103	-12.549	14.8095
59	SETH11DA	0.75	24.2838	14.8261	436.051	-12.4022	-48.4656	22.519	14.8047	404.805	-12.4532	-47.8048	221208	53.9741	3.00253	20.9722	-12.4662	14.9845
60	SETH11DB	0.73	23.7682	14.2466	431.762	-12.4652	-48.7448	21.5196	14.2182	391.474	-12.5333	-47.8638	221208	53.6266	2.94788	21.2235	-12.5464	14.3913
61	SETH10	0.75	23.9109	13.6783	429.382	-12.5581	-48.7304	21.1486	13.6428	380.441	-12.6432	-47.6289	221208	50.7254	2.81981	20.9871	-12.6564	13.8095
62	P2	0.64	45.337	-1.43837	422.433	-28.2517	-49.1779	39.1937	-1.48035	365.942	-28.3531	-47.8565	221208	57.1785	6.12402	10.8929	-28.3801	-1.483
63	SALANINE	1.12	170.932	-1.76619	441.013	-27.0412	-49.4287	144.506	-1.81515	373.708	-27.1594	-47.8871	221208	33.3668	12.9024	3.01712	-27.1855	-1.82155
64	ALANINE	1.09	15.7	-1.56	40.4	-27.11	-18	171.13	-1.56002	440.36	-27.1102	-47.4064	221208	40.4	15.7	3.00212	-27.1362	-1.56355
65	PEA	0.87	94.2824	1.61841	373.469	-26.7878	-46.6265	96.6257	1.63898	382.643	-26.779	-46.731	221208	43.982	11.1064	4.62006	-26.8047	1.67127
66	Glutamic A	1.13	77.7637	-1.61303	336.045	-10.7588	-46.3918	81.7277	-1.57203	352.971	-10.7411	-46.6007	221208	31.2364	7.23254	5.03868	-10.7526	-1.5757
67	SETH09	1.01	22.5827	13.4597	421.512	-12.5703	-46.9571	24.3546	13.5221	454.182	-12.5439	-47.2701	221208	44.9685	2.41135	21.7568	-12.557	13.6875
68	SETH08	0.99	22.6082	14.0267	413.834	-12.5061	-47.0976	25.0369	14.11	457.734	-12.4709	-47.5149	221208	46.2358	2.52898	21.3295	-12.484	14.2819
69	SETH07	1.02	22.7799	13.0731	420.352	-12.503	-47.6348	25.9233	13.1771	477.61	-12.459	-48.1561	221208	46.8245	2.5415	21.4946	-12.472	13.3386
70	Leucine	0.8	69.7736	6.16004	366.517	-28.4401	-47.1482	81.6549	6.28401	428.105	-28.3878	-47.774	221208	53.5131	10.2069	6.11666	-28.4149	6.36832
71	SALANINE	1.1	142.527	-1.68456	368.44	-27.0646	-46.8122	171.669	-1.54105	442.75	-27.0035	-47.5425	221208	40.25	15.6063	3.00894	-27.0294	-1.54438
72	ALANINE	1.12	15.7	-1.56	40.4	-27.11	-18	175.84	-1.56002	452.48	-27.1102	-47.4064	221208	40.4	15.7	3.00212	-27.1362	-1.56355
73	SETH06	1	25.3924	13.4192	490.36	-12.481	-47.4133	25.3244	13.4097	488.97	-12.4635	-47.3975	221208	48.897	2.53244	22.5263	-12.4765	13.5738
74	SETH05	1.04	25.4725	13.4401	506.397	-12.5266	-47.9177	25.3364	13.4211	503.534	-12.4916	-47.886	221208	48.4167	2.43619	23.1862	-12.5046	13.5854
75	SETH04	0.98	24.2302	13.8674	474.264	-12.5315	-47.8259	24.0366	13.8389	470.254	-12.479	-47.7785	221208	47.9851	2.45271	22.8248	-12.492	14.0078
76	SEAL	1	153.19	16.0879	424.481	-12.7815	-47.8586	151.562	16.0498	419.709	-12.7114	-47.7954	221208	41.9709	15.1562	3.23075	-12.7247	16.2435
77	P2	0.65	48.3641	-1.50507	455.089	-28.252	-47.7624	47.7235	-1.55188	448.711	-28.1658	-47.6834	221208	69.0325	7.34208	10.9694	-28.1927	-1.55533
78	SALANINE	1.12	179.661	-1.57515	462.698	-27.0548	-48.6561	176.813	-1.63131	454.939	-26.9511	-48.5613	221208	40.6195	15.7869	3.00183	-26.977	-1.63565
79	ALANINE	1.1	15.7	-1.56	40.4	-27.11	-18	172.7	-1.56002	444.4	-27.1102	-47.4064	221208	40.4	15.7	3.00212	-27.1362	-1.56355
80	PEA	0.86	104.625	1.6848	415.517	-26.6457	-47.2384	104.522	1.67256	415.263	-26.6522	-47.2592	221208	48.2864	12.1537	4.63514	-26.6778	1.70523
81	SETH03	1.06	23.3839	12.2104	453	-12.5199	-47.1728	23.3378	12.1857	452.446	-12.5333	-47.2143	221208	42.6836	2.20168	22.6179	-12.5463	12.3361
82	SETH02	1.03	21.5118	12.8173	432.579	-12.4968	-47.466	21.4482	12.7802	431.786	-12.5168	-47.5282	221208	41.921	2.08235	23.4868	-12.5298	12.9372
83	SETH01DA	1.07	23.9677	13.2849	461.862	-12.4824	-47.3218	23.8733	13.2354	460.733	-12.509	-47.4048	221208	43.0592	2.23115	22.5156	-12.5221	13.3976
84	SETH01DB	1.08	24.2976	12.8378	470.221	-12.5778	-47.4938	24.1782	12.7759	468.786	-12.6111	-47.5974	221208	43.4061	2.23872	22.6203	-12.6242	12.9329
85	SALANINE	1.09	171.568	-1.64468	442.941	-27.102	-47.3847	170.557	-1.71789	441.32	-27.1414	-47.5091	221208	40.4881	15.6475	3.01877	-27.1674	-1.72319
86	ALANINE	1.05	15.7	-1.56	40.4	-27.11	-18	164.85	-1.56002	424.2	-27.1102	-47.4064	221208	40.4	15.7	3.00212	-27.1362	-1.56355

## Sheet: Setaria_Nitrogen runset
Ps	ID	Wt	NugR	d15NR	CugR	d13CR	d18OR	Nugdc	d15Ndc	Cugdc	d13Cdc	d18Odc	Runfile	pcC	pcN	CN	normd15N
2	ALANINE	0.46	15.7	-1.56	40.4	-27.11	-18	72.22	-1.56002	185.84	-27.1102	-47.4064	230104	40.4	15.7	3.00212	-1.43882
3	ALANINE	0.45	73.8399	-1.47643	190.743	-27.1147	-48.6442	73.3089	-1.52889	189.224	-27.1206	-48.1937	230104	42.0498	16.2909	3.01139	-1.40774
4	ALANINE	0.46	74.6806	-1.63792	193.863	-27.291	-49.3994	73.6141	-1.74281	190.801	-27.3027	-48.4985	230104	41.4784	16.0031	3.02389	-1.62133
5	ALANINE	0.46	72.1745	-1.12673	186.275	-27.0999	-49.0968	70.6395	-1.28414	181.896	-27.1175	-47.7444	230104	39.5425	15.3564	3.00415	-1.16335
6	ALANINE	0.47	76.9345	-1.14977	199.33	-26.9949	-49.9391	74.7682	-1.35964	193.13	-27.0183	-48.1367	230104	41.0915	15.9081	3.01356	-1.23874
7	ALANINE	0.46	15.7	-1.56	40.4	-27.11	-18	72.22	-1.56002	185.84	-27.1102	-47.4064	230104	40.4	15.7	3.00212	-1.43882
8	ALANINE	0.45	68.1638	-1.61603	177.673	-26.9642	-46.3259	68.5114	-1.62781	178.434	-26.9697	-46.4341	230104	39.652	15.2247	3.03852	-1.50651
9	Glutamic A	0.92	74.0248	-1.68113	321.18	-10.6252	-47.9531	74.7834	-1.7047	323.941	-10.6364	-48.169	230104	35.211	8.12863	5.05367	-1.58328
10	SETD15	2.38	104.504	15.1828	1439.52	-10.9743	-53.788	106.119	15.1468	1458.16	-10.9913	-54.1098	230104	61.2671	4.45877	16.0309	15.2427
11	SETD14	2.41	104.469	14.9537	1452.99	-10.8713	-54.2812	106.632	14.9058	1478.19	-10.894	-54.7101	230104	61.3357	4.42458	16.1729	15.0021
12	SETD13	2.35	101.729	15.3697	1418.48	-10.9012	-54.0809	104.376	15.3097	1449.36	-10.9295	-54.617	230104	61.6748	4.44152	16.2003	15.4054
13	Leucine	0.76	81.3564	6.55189	424.383	-27.8498	-50.7697	83.9101	6.4806	435.519	-27.8827	-51.4151	230104	57.3052	11.0408	6.05536	6.58963
14	SEAL	0.46	67.8476	16.208	189.548	-12.7097	-47.6357	70.3453	16.124	195.376	-12.749	-48.3912	230104	42.473	15.2924	3.24028	16.2184
15	SALANINE	0.45	70.7295	-1.49588	183.495	-26.8923	-47.0011	73.721	-1.59017	189.971	-26.9362	-47.865	230104	42.2158	16.3824	3.00638	-1.46892
16	ALANINE	0.46	15.7	-1.56	40.4	-27.11	-18	72.22	-1.56002	185.84	-27.1102	-47.4064	230104	40.4	15.7	3.00212	-1.43882
17	P2	1.02	79.8113	-1.46251	723.186	-27.5536	-51.5057	79.6137	-1.48265	721.993	-27.589	-51.6473	230104	70.7837	7.80527	10.5802	-1.36156
18	SETD12	2.39	102.022	15.2156	1453.49	-10.9465	-55.2597	101.518	15.1747	1448.71	-11.0186	-55.5417	230104	60.6153	4.24763	16.6488	15.2705
19	SETD11	2.41	105.972	15.0468	1490.08	-10.92	-54.9086	105.189	14.9854	1482.73	-11.0282	-55.3318	230104	61.5242	4.36469	16.4452	15.0815
20	SETD10	2.42	106.805	15.0334	1504.65	-10.8735	-54.9982	105.755	14.9515	1494.77	-11.0177	-55.5622	230104	61.7675	4.37003	16.4901	15.0477
21	PEA	0.61	76.1421	1.51454	299.969	-26.1438	-49.4258	75.2087	1.41355	297.512	-26.3209	-50.1349	230104	48.7724	12.3293	4.61512	1.53025
22	Glutamic A	0.96	85.9118	-1.83608	372.361	-10.1895	-49.2957	84.6511	-1.95686	368.707	-10.4058	-50.1466	230104	38.4069	8.81783	5.08153	-1.83506
23	SALANINE	0.45	72.3234	-1.48128	185.582	-26.8941	-47.5858	71.0883	-1.62224	183.461	-27.1418	-48.5802	230104	40.769	15.7974	3.01087	-1.50094
24	ALANINE	0.48	15.7	-1.56	40.4	-27.11	-18	75.36	-1.56002	193.92	-27.1102	-47.4064	230104	40.4	15.7	3.00212	-1.43882
25	SETD09	2.5	88.6693	14.6643	1301.03	-11.2694	-54.9095	88.47	14.6484	1298.01	-11.3026	-54.9772	230104	51.9203	3.5388	17.117	14.7451
26	SETD08	2.49	82.8937	15.085	1276.5	-11.1934	-55.4738	82.5218	15.0532	1270.58	-11.2598	-55.6091	230104	51.0272	3.31413	17.963	15.1493
27	SETD07	2.49	85.7728	14.734	1295.92	-11.2062	-55.4727	85.1968	14.6864	1286.91	-11.3058	-55.6756	230104	51.6833	3.42156	17.6227	14.783
28	Leucine	0.8	86.9515	6.24926	452.894	-28.0133	-51.9749	86.1748	6.1863	448.708	-28.1438	-52.2464	230104	56.0885	10.7719	6.07478	6.29577
29	SEAL	0.48	73.9827	16.163	205.436	-12.8578	-48.7382	73.1585	16.0835	203.069	-13.0234	-49.0786	230104	42.306	15.2413	3.23836	16.178
30	P2	1.02	77.2814	-1.39635	702.437	-27.6965	-52.4296	76.2505	-1.49007	692.745	-27.8921	-52.8365	230104	67.9162	7.47554	10.5993	-1.36898
31	SALANINE	0.48	76.4983	-1.55203	198.348	-27.0411	-49.6258	75.3105	-1.66136	195.162	-27.2696	-50.1019	230104	40.6588	15.6897	3.02335	-1.54001
32	ALANINE	0.45	15.7	-1.56	40.4	-27.11	-18	70.65	-1.56002	181.8	-27.1102	-47.4064	230104	40.4	15.7	3.00212	-1.43882
33	PEA	0.61	77.6819	1.63506	305.122	-26.8842	-49.6259	78.1502	1.61808	307.05	-26.8807	-49.6762	230104	50.3361	12.8115	4.58381	1.73447
34	SETD05DA	2.61	80.1914	14.5888	1228.93	-11.5784	-55.7989	81.1641	14.5545	1244.56	-11.5713	-55.8988	230104	47.6843	3.10974	17.8895	14.6513
35	SETD05DB	2.56	78.6642	14.5764	1211.42	-11.5568	-55.9416	80.1043	14.5248	1234.68	-11.5462	-56.0915	230104	48.2297	3.12907	17.9823	14.6216
36	SETD06	2.65	79.8778	14.7785	1248.29	-11.5282	-56.0788	81.8395	14.7097	1280.45	-11.514	-56.2786	230104	48.3189	3.08828	18.2535	14.8062
37	SETD04	2.6	81.4332	14.7057	1238.1	-11.4539	-55.9985	83.9485	14.6197	1278.23	-11.4362	-56.2482	230104	49.1627	3.22879	17.7641	14.7164
38	Glutamic A	0.94	78.8618	-1.79441	342.653	-10.7312	-51.0672	81.8031	-1.8959	356.068	-10.7098	-51.3685	230104	37.8795	8.70246	5.0782	-1.7742
39	SALANINE	0.49	77.0889	-1.61308	199.099	-27.4026	-48.6435	80.4642	-1.73152	208.253	-27.3779	-48.9958	230104	42.5005	16.4213	3.0195	-1.61006
40	ALANINE	0.47	15.7	-1.56	40.4	-27.11	-18	73.79	-1.56002	189.88	-27.1102	-47.4064	230104	40.4	15.7	3.00212	-1.43882
41	SETD03	2.73	85.1507	14.0916	1235.33	-11.8266	-55.6605	84.6345	14.1172	1227.87	-11.7631	-55.6029	230104	44.9769	3.10016	16.9259	14.2146
42	SETD02	2.7	79.3998	13.857	1230.69	-11.6555	-56.0711	78.4429	13.9081	1215.91	-11.5287	-55.9559	230104	45.0338	2.90529	18.0841	14.0058
43	SETD01	2.71	84.1519	13.7475	1225.94	-11.6264	-56.1541	82.6398	13.8241	1203.99	-11.4361	-55.9813	230104	44.4278	3.04944	16.9974	13.922
44	Leucine	0.76	85.2275	6.2665	444.177	-28.3112	-52.0213	83.1978	6.3679	433.638	-28.0616	-51.7899	230104	57.0577	10.9471	6.08083	6.4771
45	SEAL	0.48	75.9328	15.9124	210.709	-12.9983	-48.8716	73.6857	16.0404	204.497	-12.6815	-48.5814	230104	42.6034	15.3512	3.2378	16.1349
46	P2	1.04	82.5235	-1.64375	750.561	-27.7967	-53.1858	79.6102	-1.49285	724.163	-27.4221	-52.8391	230104	69.631	7.65483	10.6124	-1.37175
47	SALANINE	0.46	72.4398	-1.62963	186.096	-27.5045	-50.7198	69.4737	-1.45356	178.504	-27.0673	-50.3142	230104	38.8052	15.103	2.9976	-1.33252
48	ALANINE	0.5	15.7	-1.56	40.4	-27.11	-18	78.5	-1.56002	202	-27.1102	-47.4064	230104	40.4	15.7	3.00212	-1.43882
49	PEA	0.64	78.5324	1.80244	309.659	-26.1268	-49.1855	78.5612	1.78495	309.829	-26.1506	-49.3211	230104	48.4108	12.2752	4.60109	1.90109
50	SETH15	2	75.9036	14.5778	1213.63	-11.1621	-55.2822	75.9593	14.5423	1214.97	-11.2106	-55.5517	230104	60.7483	3.79796	18.6608	14.6392
51	SETH14	2.01	78.734	14.2805	1216.36	-11.0672	-55.9387	78.8208	14.2274	1218.37	-11.1399	-56.3426	230104	60.6153	3.92143	18.0337	14.3247
52	SETH13	2.04	77.6062	14.6994	1250.84	-11.1305	-56.0857	77.7203	14.6285	1253.6	-11.2274	-56.6241	230104	61.4509	3.80982	18.8179	14.7252
53	Glutamic A	0.93	78.7264	-1.90217	343.368	-10.2043	-51.0108	78.871	-1.98926	344.315	-10.3255	-51.6873	230104	37.0231	8.48076	5.09314	-1.86741
54	Leucine	0.78	84.2985	6.59574	438.222	-27.7106	-51.7273	84.4845	6.49034	439.673	-27.8531	-52.5384	230104	56.3683	10.8313	6.07155	6.59935
55	SALANINE	0.46	68.7712	-1.63912	178.153	-26.9413	-47.5598	68.9483	-1.76108	178.842	-27.1076	-48.5101	230104	38.8786	14.9888	3.02616	-1.63957
56	ALANINE	0.45	15.7	-1.56	40.4	-27.11	-18	70.65	-1.56002	181.8	-27.1102	-47.4064	230104	40.4	15.7	3.00212	-1.43882
57	SEAL	0.46	71.1442	16.0881	197.116	-12.9597	-48.0023	71.1376	16.1099	197.018	-12.9537	-47.7667	230104	42.83	15.4647	3.23112	16.2043
58	SETH12	2.07	74.2534	14.5862	1223.53	-11.3436	-56.5097	74.2397	14.6298	1222.31	-11.3316	-56.0426	230104	59.0486	3.58646	19.2083	14.7265
59	SETH11DA	2.07	72.4977	14.6255	1213.62	-11.338	-57.1242	72.4777	14.6909	1211.81	-11.3199	-56.4239	230104	58.5413	3.50134	19.5063	14.7875
60	SETH11DB	2.08	73.3792	14.4606	1231.33	-11.3064	-57.3758	73.3523	14.5477	1228.87	-11.2822	-56.442	230104	59.0805	3.52655	19.5452	14.6446
61	SETH10	2.05	73.0663	14.2905	1221.86	-11.2473	-57.4221	73.0328	14.3994	1218.81	-11.2171	-56.2547	230104	59.4543	3.56257	19.47	14.4965
62	P2	1.04	78.1849	-1.88922	720.074	-27.4772	-54.9388	78.1418	-1.76055	717.919	-27.4425	-53.5338	230104	69.0307	7.51364	10.7186	-1.63905
63	SALANINE	0.49	76.718	-1.64116	199.103	-27.0298	-51.8137	76.6687	-1.491	198.408	-26.9894	-50.1688	230104	40.4915	15.6467	3.01918	-1.36991
64	ALANINE	0.47	15.7	-1.56	40.4	-27.11	-18	73.79	-1.56002	189.88	-27.1102	-47.4064	230104	40.4	15.7	3.00212	-1.43882
65	PEA	0.65	79.9704	1.73328	314.22	-26.3514	-48.1819	80.2779	1.72407	315.292	-26.3464	-48.2087	230104	48.5065	12.3504	4.58209	1.8403
66	Glutamic A	0.92	79.6389	-1.68642	344.026	-10.4384	-49.0658	80.2536	-1.70476	346.381	-10.4283	-49.1194	230104	37.6501	8.72321	5.03543	-1.58334
67	SETH09	2.95	90.1533	14.5953	1512.62	-11.3012	-56.1764	91.2012	14.5673	1528.2	-11.286	-56.2562	230104	51.8035	3.09156	19.5491	14.6641
68	SETH08	2.93	89.5983	14.6579	1497.03	-11.2527	-56.4246	90.9922	14.6206	1517.66	-11.2325	-56.5309	230104	51.7973	3.10554	19.4589	14.7173
69	SETH07	2.94	89.291	14.4639	1502.53	-11.2369	-56.5148	91.0342	14.4173	1528.51	-11.2117	-56.6477	230104	51.99	3.0964	19.5889	14.5143
70	Leucine	0.75	78.8032	6.32838	409.939	-27.7508	-51.6611	80.6566	6.27292	418.473	-27.7208	-51.8214	230104	55.7964	10.7542	6.05305	6.38226
71	SALANINE	0.49	73.6294	-1.46186	189.134	-26.9897	-47.2049	75.6577	-1.52606	193.744	-26.9547	-47.3928	230104	39.5395	15.4403	2.98759	-1.40491
72	ALANINE	0.48	15.7	-1.56	40.4	-27.11	-18	75.36	-1.56002	193.92	-27.1102	-47.4064	230104	40.4	15.7	3.00212	-1.43882
73	SETH06	3	85.9991	14.2429	1477.53	-11.286	-55.9736	85.5301	14.2405	1471.31	-11.3298	-55.8945	230104	49.0438	2.851	20.0693	14.3377
74	SETH05	2.96	81.8868	14.6038	1450.5	-11.2335	-56.4503	80.9986	14.5991	1438.35	-11.3211	-56.2923	230104	48.5928	2.73644	20.7173	14.6958
75	SETH04	2.96	83.7513	14.563	1472.05	-11.1775	-56.5064	82.3961	14.5559	1453.63	-11.3089	-56.2694	230104	49.1091	2.78365	20.5823	14.6527
76	SEAL	0.5	78.4593	15.8723	216.003	-12.4597	-49.9098	76.7757	15.8627	212.414	-12.6348	-49.5915	230104	42.4827	15.3551	3.22779	15.9576
77	P2	1	77.8049	-1.50146	704.321	-27.3928	-52.2577	75.729	-1.51323	689.75	-27.6088	-51.8608	230104	68.975	7.5729	10.6262	-1.3921
78	SALANINE	0.45	71.7348	-1.50819	184.416	-26.7264	-49.6217	69.4502	-1.52231	179.856	-26.9858	-49.1441	230104	39.9681	15.4334	3.02134	-1.40117
79	ALANINE	0.49	15.7	-1.56	40.4	-27.11	-18	76.93	-1.56002	197.96	-27.1102	-47.4064	230104	40.4	15.7	3.00212	-1.43882
80	PEA	0.63	76.1957	1.77199	300.177	-26.5859	-47.3949	76.6155	1.78683	301.263	-26.57	-47.4962	230104	47.8195	12.1612	4.5875	1.90296
81	SETH03	3.41	86.6942	13.9839	1479.11	-11.7775	-55.8791	87.6548	14.014	1489.85	-11.7453	-56.0798	230104	43.6907	2.57052	19.8296	14.1116
82	SETH02	3.42	82.9062	14.3046	1487.61	-11.7407	-56.0721	84.2918	14.3497	1503.87	-11.6924	-56.373	230104	43.9728	2.46467	20.8148	14.4468
83	SETH01DA	3.43	86.6106	13.9363	1493.81	-11.6411	-56.0724	88.5516	13.9964	1515.67	-11.5767	-56.4736	230104	44.1885	2.58168	19.9689	14.094
84	SETH01DB	3.46	86.7113	14.1062	1485.54	-12.033	-56.118	89.154	14.1813	1512.8	-11.9526	-56.6194	230104	43.7227	2.5767	19.7965	14.2787
85	SALANINE	0.49	75.6537	-1.28778	196.224	-27.1968	-48.4289	78.2255	-1.19901	200.561	-27.1011	-49.0354	230104	40.9308	15.9644	2.9912	-1.07836
86	ALANINE	0.45	15.7	-1.56	40.4	-27.11	-18	70.65	-1.56002	181.8	-27.1102	-47.4064	230104	40.4	15.7	3.00212	-1.43882
